# Supplementary material
Source: ML conference proceedings conference paper supplement (https://openreview.net/forum?id=XfQbPqRPXi)
Supplement: supplementary_material [file attachment]

---

# Towards Better Evaluation of GNN Expressiveness with BREC Dataset

---

**Yanbo Wang   Muhan Zhang**  
Institute for Artificial Intelligence, Peking University  
yanxwb202@gmail.com, muhan@pku.edu.cn

## Abstract

1        Research on the theoretical expressiveness of Graph Neural Networks (GNNs)  
2        has developed rapidly, and many methods have been proposed to enhance the  
3        expressiveness. However, most methods do not have a uniform expressiveness  
4        measure except for a few that strictly follow the  $k$ -dimensional Weisfeiler-Lehman  
5        ( $k$ -WL) test hierarchy. Their theoretical analyses are often limited to distinguishing  
6        certain families of non-isomorphic graphs, leading to difficulties in quantitatively  
7        comparing their expressiveness. In contrast to theoretical analysis, another way to  
8        measure expressiveness is by evaluating model performance on certain datasets  
9        containing 1-WL-indistinguishable graphs. Previous datasets specifically designed  
10        for this purpose, however, face problems with difficulty (any model surpassing 1-  
11        WL has nearly 100% accuracy), granularity (models tend to be either 100% correct  
12        or near random guess), and scale (only a few essentially different graphs in each  
13        dataset). To address these limitations, we propose a new expressiveness dataset,  
14        **BREC**, which includes 400 pairs of non-isomorphic graphs carefully selected from  
15        four primary categories (Basic, Regular, Extension, and CFI). These graphs have  
16        higher difficulty (up to 4-WL-indistinguishable), finer granularity (able to compare  
17        models between 1-WL and 3-WL), and a larger scale (400 pairs). Further, we  
18        synthetically test 23 models with higher-than-1-WL expressiveness on our BREC  
19        dataset. Our experiment gives the first thorough comparison of the expressiveness  
20        of those state-of-the-art beyond-1-WL GNN models. We expect this dataset to  
21        serve as a benchmark for testing the expressiveness of future GNNs. Our dataset  
22        and evaluation code are released at: <https://github.com/GraphPKU/BREC>.

## 23    1 Introduction

24    GNNs have been extensively utilized in bioinformatics, recommender systems, social networks, and  
25    others, yielding remarkable outcomes [1–6]. Despite impressive empirical achievements, related  
26    investigations have revealed that GNNs exhibit limited abilities to distinguish non-isomorphic graphs,  
27    such as regular graphs. In a practical scenario, the inability to recognize structure may cause issues,  
28    such as confused representation of a benzene ring (a six-cycle that cannot be recognized). Xu et al.  
29    [7], Morris et al. [8] established a connection between the expressiveness of message-passing neural  
30    networks (MPNNs) and the WL test for graph isomorphism testing, demonstrating that MPNN’s  
31    upper bound is 1-WL. Numerous subsequent studies have proposed GNN variants with enhanced  
32    expressiveness [9–13].

33    Given the multitude of models employing different approaches, such as feature injection, adherence  
34    to the WL hierarchy, equivariance maintenance, and subgraph extraction, a unified framework that  
35    can theoretically compare the expressive power among various variants is highly desirable. In  
36    this regard, Maron et al. [14] propose the concept of  $k$ -order invariant/equivariant graph networks,  
37    which unify linear layers while preserving permutation invariance/equivariance. Additionally, Frasca

38 et al. [15] unify recent subgraph GNNs and establish that their expressiveness upper bound is 3-  
 39 WL. Zhang et al. [16] construct a comprehensive expressiveness hierarchy for subgraph GNNs,  
 40 providing counterexamples for each pairwise distinction. Nonetheless, the magnitude of the gaps  
 41 remains unknown. Furthermore, there exist methods that are difficult to categorize within the  $k$ -WL  
 42 hierarchy. For instance, Papp and Wattenhofer [17] propose four extensions of GNNs, each of which  
 43 cannot strictly compare with the other. Similarly, Feng et al. [18] propose a GNN that is partially  
 44 stronger than 3-WL yet fails to distinguish many graphs that are distinguishable by 3-WL. In a  
 45 different approach, Huang et al. [19] propose evaluating expressiveness by enumerating specific  
 46 significant substructures, such as 6-cycles. Zhang et al. [20] introduces graph biconnectivity to test  
 47 expressiveness.

48 Without a unified theoretical characterization of expressiveness, employing expressiveness datasets  
 49 for testing proves valuable. Notably, three expressiveness datasets, EXP, CSL, and SR25, have been  
 50 introduced by Abboud et al. [21], Murphy et al. [22], Balcilar et al. [9] and have found widespread  
 51 usage in recent studies. However, these datasets exhibit notable limitations. Firstly, they lack sufficient  
 52 difficulty. The EXP and CSL datasets solely consist of examples where 1-WL fails, and most recent  
 53 GNN variants have achieved perfect accuracy on these datasets. Secondly, the granularity of these  
 54 datasets is too coarse, which means that graphs in these datasets are generated using a single method,  
 55 resulting in a uniform level of discrimination difficulty. Consequently, the performance of GNN  
 56 variants often falls either at random guessing (completely indistinguishable) or 100% (completely  
 57 distinguishable), thereby hindering the provision of a nuanced measure of expressiveness. Lastly,  
 58 these datasets suffer from small sizes, typically comprising only a few substantially different graphs,  
 59 raising concerns of incomplete measurement.

60 To overcome the limitations of current expressiveness datasets, we propose a new dataset, BREC,  
 61 including 400 pairs of non-isomorphic graphs in 4 major categories: Basic graphs, Regular graphs,  
 62 Extension graphs, and CFI graphs. Compared to previous ones, BREC has a greater difficulty (up to  
 63 4-WL-indistinguishable), finer granularity (able to compare models between 1-WL and 3-WL), and  
 64 larger scale (800 non-isomorphic graphs organized as 400 pairs), addressing the shortcomings.

65 Due to the increased size and diversity of the dataset, the traditional classification task may not be  
 66 suitable for training-based evaluation methods which rely on generalization ability. Thus, we propose  
 67 a novel evaluation procedure based on directly comparing the discrepancies between model outputs to  
 68 test pure practical expressiveness. Acknowledging the impact of numerical precision owing to tiny  
 69 differences between graph pairs, we propose reliable paired comparisons building upon a statistical  
 70 method [23, 24], which offers a precise error bound. Experiments verify that the evaluation procedure  
 71 aligns well with known theoretical results.

72 Finally, we comprehensively compared 23 representative beyond-1-WL models on BREC. Our  
 73 experiments first give a **reliable empirical comparison** of state-of-the-art GNNs’ expressiveness.  
 74 The currently most thorough investigation is a good start for gaining deeper insights into various  
 75 schemes to enhance GNNs’ expressiveness. On BREC, GNN accuracies range from 41.5% to  
 76 70.2%, with I<sup>2</sup>-GNN [19] performing the best. The 70.2% highest accuracy also implies that the  
 77 dataset is **far from saturation**. We expect BREC can serve as a benchmark for testing future GNNs’  
 78 expressiveness. We also welcome contributions and suggestions to improve BREC. Our dataset and  
 79 evaluation code are included in <https://github.com/GraphPKU/BREC>.

## 80 2 Limitations of Existing Datasets

81 **Preliminary.** We utilize the notation  $\{\}$  to represent sets and  $\{\{\}\}$  to represent multisets. The  
 82 cardinality of a (multi)set  $\mathbb{S}$  is denoted as  $|\mathbb{S}|$ . The index set is denoted as  $[n] = 1, \dots, n$ . A graph  
 83 is denoted as  $\mathcal{G} = (\mathbb{V}(\mathcal{G}), \mathbb{E}(\mathcal{G}))$ , where  $\mathbb{V}(\mathcal{G})$  represents the set of *nodes* or *vertices* and  $\mathbb{E}(\mathcal{G})$   
 84 represents the set of *edges*. Without loss of generality, we assume  $|\mathbb{V}(\mathcal{G})| = n$  and  $\mathbb{V}(\mathcal{G}) = [n]$ .

85 The permutation or reindexing of  $\mathcal{G}$  is denoted as  $\mathcal{G}^\pi = (\mathbb{V}(\mathcal{G}^\pi), \mathbb{E}(\mathcal{G}^\pi))$  with the permutation  
 86 function  $\pi : [n] \rightarrow [n]$ , s.t.  $(u, v) \in \mathbb{E}(\mathcal{G}) \iff (\pi(u), \pi(v)) \in \mathbb{E}(\mathcal{G}^\pi)$ . Node and edge features are  
 87 excluded from the definitions for simplicity. Additional discussions about features can be found in  
 88 Appendix B.

89 **Graph Isomorphism (GI) Problem.** Two graphs  $\mathcal{G}$  and  $\mathcal{H}$  are considered isomorphic (denoted as  
 90  $\mathcal{G} \simeq \mathcal{H}$ ) if  $\exists \phi$  (a bijection mapping)  $:\mathbb{V}(\mathcal{G}) \rightarrow \mathbb{V}(\mathcal{H})$  s.t.  $(u, v) \in \mathbb{E}(\mathcal{G})$  iff.  $(\phi(u), \phi(v)) \in \mathbb{E}(\mathcal{H})$ .

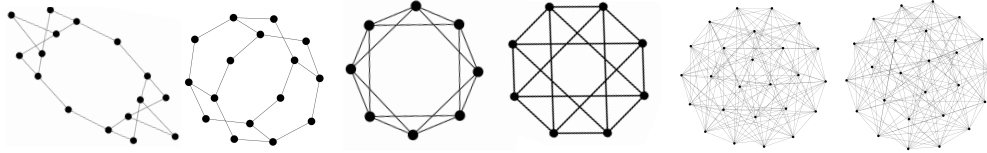

(a) EXP dataset core pair sample (b) CSL graphs ( $m = 10, r = 2$ ) (c) SR25 dataset sample  
Figure 1: Sample graphs in previous datasets

Table 1: Dataset statistics

| Dataset     | # Graphs | # Core graphs <sup>a</sup> | # Nodes       | Hardness                              | Metrics                     |
|-------------|----------|----------------------------|---------------|---------------------------------------|-----------------------------|
| EXP         | 1200     | 6                          | 33-73         | 1-WL-indistinguishable                | 2-way classification        |
| CSL         | 150      | 10                         | 41            | 1-WL-indistinguishable                | 10-way classification       |
| SR25        | 15       | 15                         | 25            | 3-WL-indistinguishable                | 15-way classification       |
| <b>BREC</b> | 800      | <b>800</b>                 | <b>10-198</b> | <b>1-WL to 4-WL-indistinguishable</b> | Reliable Paired Comparisons |

<sup>a</sup> Core graphs represent graphs that actually serve to measure expressiveness.

91 GI is essential in expressiveness. Only if GNN successfully distinguishes two non-isomorphic graphs  
 92 can they be assigned different labels. Some researchers [25, 26] indicate the equivalence between GI  
 93 and function approximation, underscoring the importance of GI. However, we currently do not have  
 94 polynomial-time algorithms for solving the GI problem. A naive solution involves iterating all  $n!$   
 95 permutations to test whether such a bijection exists.

96 **Weisfeiler-Lehman algorithm (WL).** WL is a well-known isomorphism test relying on color refine-  
 97 ment [27]. In each iteration, WL assigns a state (or color) to each node by aggregating information  
 98 from its neighboring nodes' states. This process continues until convergence, resulting in a multiset  
 99 of node states representing the final graph representation. While WL effectively identifies most  
 100 non-isomorphic graphs, it may fail in certain simple graphs, leading to the development of extended  
 101 versions. One such extension is  $k$ -WL, which treats each  $k$ -tuple of nodes as a unit for aggregating  
 102 information. Another slightly different method [28] is also referred to as  $k$ -WL. To avoid confusion,  
 103 we follow Morris et al. [8] to call the former  $k$ -WL and the latter  $k$ -FWL. Further information can be  
 104 found in Appendix C.

105 Given the significance of GI and WL, several expressiveness datasets have been introduced, with the  
 106 following three being the most frequently utilized. We selected a pair of graphs from each dataset,  
 107 which are illustrated in Figure 1. Detailed statistics for these datasets are presented in Table 1.

108 **EXP Dataset.** This dataset comprises 600 pairs of non-isomorphic graphs where the 1-WL test fails.  
 109 Graphs are generated pair-wised, and each graph comprises two disconnected components. The first  
 110 component, the "core component," is designed to be non-isomorphic with the other graph's "core  
 111 component," each satisfying distinct SAT conditions in the two graphs. The second component,  
 112 referred to as the "planar component," is identical in both graphs and introduces noise into the dataset.  
 113 However, it is important to note that there are only **three substantially different** core pairs, which  
 114 can truly evaluate the expressiveness of the models.

115 Each graph in EXP is labeled 0/1 based on whether its core component satisfies the SAT condition for  
 116 a binary classification problem. Although EXP addresses the issue of semantic labeling by introducing  
 117 SAT problem and enhances the dataset's size and complexity by including planar components, the  
 118 simplicity of core c generation and the insufficient number of different core pairs result in most recent  
 119 GNNs achieving nearly 100% accuracy on EXP, making it difficult for detailed comparisons.

120 **CSL Dataset.** This dataset consists of 150 Circulant Skip Links (CSL) graphs, where the 1-WL test  
 121 fails. A CSL graph is defined as follows: Let  $r$  and  $m$  be co-prime natural numbers with  $r < m - 1$ .  
 122  $\mathcal{G}(m, r) = (\mathbb{V}, \mathbb{E})$  is an undirected 4-regular graph with  $\mathbb{V} = [m]$ , where the edges form a cycle and  
 123 include skip links. Specifically, for the cycle,  $(j, j + 1) \in \mathbb{E}$  for  $j \in [m - 1]$ , and  $(m, 1) \in \mathbb{E}$ . For the  
 124 skip links, the sequence is recursively defined as  $s_1 = 1, s_{i+1} = (s_i + r) \bmod m + 1$ , and  $(s_i, s_{i+1}) \in$   
 125  $\mathbb{E}$  for any  $i \in \mathbb{N}$ . In CSL, we consider CSL graphs with  $m = 41$  and  $r = 2, 3, 4, 5, 6, 9, 11, 12, 13, 16$ ,  
 126 resulting in 10 distinct CSL graphs. For each distinct CSL graph, we generate 14 corresponding  
 127 graphs by randomly reindexing the nodes. As a result, the dataset contains a total of 150 graphs.

128 In CSL, each of the 10 distinct CSL graphs is treated as a separate class, and the task is to train a  
 129 10-way classification model. While the dataset allows for the generation of 4-regular graphs with  
 130 any number of nodes, the final dataset contains only **ten essentially different** regular graphs with the

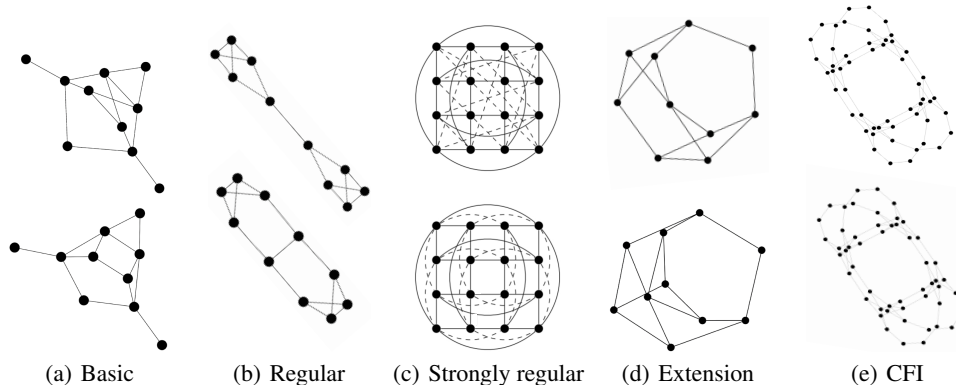

Figure 2: BREC dataset samples

131 **same number of nodes and degree.** Due to the nature of regular graphs and their fixed structure,  
 132 many recent expressive GNN models perform well on this dataset, achieving close to 100% accuracy.

133 **SR25 Dataset.** It consists of 15 strongly regular graphs (SR) where the 3-WL test fails. Each graph is  
 134 an SR with 25 nodes and a degree of 12. In these graphs, connected nodes have 5 common neighbors,  
 135 while non-connected nodes have 6. In practice, SR25 is transformed into a 15-way classification  
 136 problem for mapping each graph into a different class where the training and test graphs overlap.

137 Indeed, 3-WL serves as an upper bound for most recent expressive GNNs. Thus most methods  
 138 only obtain 6.67% (1/15) accuracy. While some models partially surpassing 3-WL easily achieve  
 139 completely distinguishable (100%) performance [18], since each graph is an SR with the same  
 140 parameters. This binary outcome can hardly provide a fine-grained expressiveness measure.

141 **Summary.** These three datasets have limitations regarding difficulty, granularity, and scale. In terms  
 142 of difficulty, these datasets are all bounded by 3-WL, failing to evaluate models (partly) beyond  
 143 3-WL [18, 19]. In terms of granularity, the graphs are generated in one way, and the parameters of  
 144 the graphs are repetitive, which easily leads to a 0/1 step function of model performance and cannot  
 145 measure subtle differences between models. In terms of scale, the number of substantially different  
 146 graphs in the datasets is small, and the test results may be incomplete to reflect expressiveness  
 147 measurement.

### 148 3 BREC: A New Dataset for Expressiveness

149 We propose a new expressiveness dataset, BREC, to address the limitations regarding difficulty,  
 150 granularity, and scale. It consists of four major categories of graphs: Basic, Regular, Extension,  
 151 and CFI. Basic graphs include relatively simple 1-WL-indistinguishable graphs. Regular graphs  
 152 include four types of subcategorized regular graphs. Extension graphs include special graphs that  
 153 arise when comparing four kinds of GNN extensions [17]. CFI graphs include graphs generated by  
 154 CFI methods<sup>1</sup> [28] with high difficulty. Some samples are shown in Fig 2.

#### 155 3.1 Dataset Composition

156 BREC includes 800 non-isomorphic graphs arranged in a pairwise manner to construct 400 pairs, with  
 157 detailed composition as follows: (For a more detailed generation process, please refer to AppendixK)

158 **Basic Graphs.** Basic graphs consist of 60 pairs of 10-node graphs. These graphs are collected  
 159 from an exhaustive search and intentionally designed to be non-regular. Although they are 1-  
 160 WL-indistinguishable, most can be distinguished by expressive GNN variants. Basic graphs can  
 161 also be regarded as an augmentation of the EXP dataset, as they both employ non-regular 1-WL-  
 162 indistinguishable graphs. Nevertheless, Basic graphs offer a greater abundance of instances and more  
 163 intricate graph patterns. The relatively small size also facilitates visualization and analysis.

164 **Regular Graphs.** Regular graphs consist of 140 pairs of regular graphs, including 50 pairs of simple  
 165 regular graphs, 50 pairs of strongly regular graphs, 20 pairs of 4-vertex condition graphs, and 20 pairs

<sup>1</sup>CFI is short for Cai-Furer-Immerman algorithm, which can generate counterexample graphs for any k-WL.

166 of distance regular graphs. Each pair of graphs shares identical parameters. A regular graph refers  
 167 to a graph where all nodes possess the same degree. Regular graphs are 1-WL-indistinguishable,  
 168 and some studies delve into the analysis of GNN expressiveness from this perspective [29, 13]. We  
 169 denote regular graphs without any special properties as simple regular graphs. When exploring  
 170 more intricate regular graphs, the concept of strongly regular graphs (where 3-WL fails) is often  
 171 introduced. Strongly regular graphs further require that the number of neighboring nodes shared by  
 172 any two nodes depends solely on their connectivity. Notable examples of strongly regular graphs  
 173 include the  $4 \times 4$ -Rook’s graph and the Shrikhande graph (Fig 2(c)). Additionally, the  $4 \times 4$ -Rook’s  
 174 graph satisfies the 4-vertex condition property, which signifies that the number of connected edges  
 175 between the common neighbors of any two nodes is solely determined by their connectivity [30]. It  
 176 is worth mentioning that the diameter of a connected strongly regular graph is always 2 [31]. A more  
 177 challenging type of graph known as the distance regular graphs [32] is proposed aiming for extending  
 178 the diameter. Please refer to Appendix A for a more comprehensive exploration of their relationship.

179 Regular graphs can also as an enriching addition to the CSL and SR25 datasets. By expanding upon  
 180 the existing subdivisions of regular graphs, this section widens the range of difficulty and raises the  
 181 upper bound of complexity. Moreover, unlike the previous datasets, regular graphs are not limited to  
 182 sharing identical parameters for all graphs within each category, greatly enhancing diversity.

183 **Extension Graphs.** Extension graphs include 100 pairs of graphs inspired by Papp and Wattenhofer  
 184 [17]. They proposed 4 types of theoretical GNN extensions:  $k$ -WL hierarchy-based, substructure-  
 185 counting-based,  $k$ -hop-subgraph-based, and marking-based methods. The authors reveal that most of  
 186 them are not strictly comparable. Leveraging the insights from theoretical analysis and some empiri-  
 187 cally derived findings, we generated 100 pairs of 1-WL-indistinguishable and 3-WL-distinguishable  
 188 graphs to improve the granularity. Noting that it was not considered in any of the previous datasets.

189 **CFI Graphs.** CFI graphs consist of 100 pairs of graphs inspired by Cai et al. [28]. They developed a  
 190 method to generate graphs distinguishable by  $k$ -WL but not by  $(k - 1)$ -WL for any  $k$ . We utilized  
 191 this method to create 100 pairs of graphs spanning up to 4-WL-indistinguishable, even surpassing the  
 192 current research’s upper bounds. Specifically, 60 pairs are solely distinguishable by 3-WL, 20 are  
 193 solely distinguishable by 4-WL, and 20 are even 4-WL-indistinguishable. Similar to the previously  
 194 mentioned parts, CFI graphs were not considered in the previous datasets. As the most challenging  
 195 part, it pushes the upper limit of difficulty even higher. Furthermore, the graph sizes in this section  
 196 are larger than other parts (up to 198 nodes). This aspect intensifies the challenge of the dataset,  
 197 demanding a model’s ability to process graphs with heterogeneous sizes effectively.

## 198 3.2 Advantages

199 **Difficulty.** By utilizing the CFI method, we specifically provide graphs being 4-WL-indistinguishable.  
 200 Additionally, we include 4-vertex condition graphs and distance regular graphs, which are variants of  
 201 strongly regular graphs (3-WL-indistinguishable) but pose greater challenges in terms of complexity.

202 **Granularity.** The different classes of graphs in BREC exhibit varying difficulty levels, each con-  
 203 tributing to the dataset in distinct ways. Basic graphs contain fundamental 1-WL-indistinguishable  
 204 graphs, similar to the EXP dataset, as a starting point for comparison. Regular graphs extend the CSL  
 205 and SR25 datasets. The major components of regular graphs are simple regular graphs and strongly  
 206 regular graphs, where 1-WL and 3-WL fail, respectively. Including 4-vertex condition graphs and  
 207 distance regular graphs further elevates the complexity. Extension graphs bridge the gap between  
 208 1-WL and 3-WL, offering a finer-grained comparison for evaluating models beyond 1-WL. CFI  
 209 graphs span the spectrum of difficulty from 1-WL to 4-WL-indistinguishable. By comprehensive  
 210 graph composition, BREC explores the boundaries of graph pattern distinguishability.

211 **Scale.** While previous datasets relied on only tens of different graphs to generate the dataset, BREC  
 212 utilizes a collection of 800 different graphs. This significant increase in the number of graphs greatly  
 213 enhances the diversity. The larger graph set in BREC also contributes to a more varied distribution of  
 214 graph statistics. In contrast, previous datasets such as CSL and SR25 only have the same number of  
 215 nodes and degrees across all graphs. For detailed statistics of BREC, please refer to Appendix D.

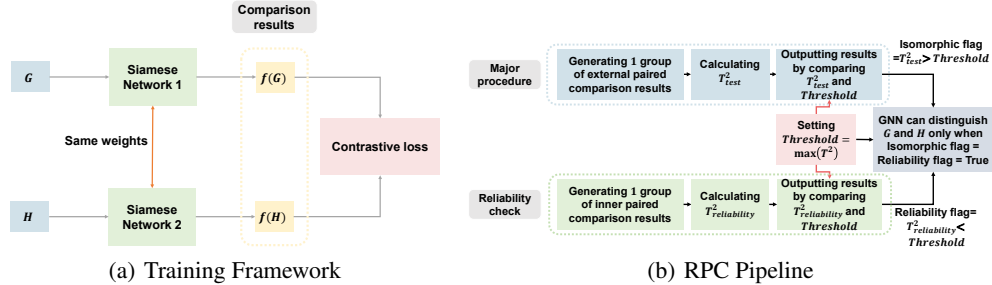

Figure 3: Evaluation Method

## 216 4 RPC: A New Evaluation Method

217 This section introduces a novel training framework and evaluation method for BREC. Unlike previous  
 218 datasets, BREC departs from the conventional classification setting, where each graph is assigned  
 219 a label, a classification model is trained, and the accuracy on test graphs serves as the measure  
 220 of expressiveness. The labeling schemes used in previous datasets like semantic labels based on  
 221 SAT conditions in EXP, or distinct labels for essentially different graphs in CSL and SR25, do not  
 222 apply to BREC. There are two primary reasons. First, BREC aims to enrich the diversity of graphs,  
 223 which precludes using a semantic label tied to SAT conditions, as it would significantly limit the  
 224 range of possible graphs. Second, assigning a distinct label to each graph in BREC would result in  
 225 an 800-class classification problem, where performance could be influenced by factors other than  
 226 expressiveness. Our core idea is to measure models' "separating power" directly. Thus BREC is  
 227 organized in pairs, where each pair is individually tested to determine whether a GNN can distinguish  
 228 them. By adopting a pairwise evaluation method, BREC provides a more focused measure of models'  
 229 expressiveness, aligning to assess distinguishing ability.

230 Nevertheless, how can we say a pair of graphs is successfully distinguished? Previous researchers  
 231 tend to set a small threshold (like 1E-4) manually. If the embedding distance between them is  
 232 larger than the threshold, the GNN is considered can distinguish them. However, this method  
 233 lacks **reliability** due to numerical precision, especially when graphs vary in size. In order to yield  
 234 dependable outcomes, we propose an evaluation method measuring both **external difference** and  
 235 **internal fluctuations**. Furthermore, we introduce a training framework for pairwise data, employing  
 236 the siamese network design [33] and contrastive loss [34, 35]. The pipeline is depicted in Fig 3(a).

### 237 4.1 Training Framework

238 We adhere to the siamese network design [33] to train a model to distinguish each pair of graphs. The  
 239 central component consists of two identical models that maintain identical parameters. When a pair  
 240 of graphs is inputted, it produces a corresponding pair of embeddings. Subsequently, the difference  
 241 between them is assessed using cosine similarity. The loss function is formulated as follows:

$$242 L(f, \mathcal{G}, \mathcal{H}) = \text{Max}(0, \frac{f(\mathcal{G}) \cdot f(\mathcal{H})}{\|f(\mathcal{G})\| \|f(\mathcal{H})\|} - \gamma), \quad (1)$$

242 where the GNN model  $f : \{\mathcal{G}\} \rightarrow \mathbb{R}^d$ ,  $\mathcal{G}$  and  $\mathcal{H}$  are two non-isomorphic graphs, and  $\gamma$  is a margin  
 243 hyperparameter (set to 0 in our experiments). The loss function aims to promote the cosine similarity  
 244 value lower than  $\gamma$ , thereby encouraging a greater separation between the two graph embeddings.

245 The training process **yields several benefits** for the models. Firstly, it enables the GNN to achieve  
 246 its theoretical expressiveness. The theoretical analysis of GNN expressiveness focuses primarily  
 247 on the network's structure without imposing any constraints on its parameters, which means we  
 248 are exploring the expressiveness of **a group of functions**. If a model with particular parameters  
 249 can distinguish a pair of graphs, the model's design and structure possess sufficient expressiveness.  
 250 However, it is impractical to iterate all possible parameter combinations to test the real upper bound.  
 251 Hence, training can **realize searching** in the function space, enabling models to achieve better  
 252 practical expressiveness. Furthermore, training aids components to **possess specific properties**, such  
 253 as injectivity and universal approximation, which are vital for attaining theoretical expressiveness.  
 254 These properties require specific parameter configurations, and randomly initialized parameters may  
 255 not satisfy these requirements. Moreover, through training, model-distinguishable pairs are **more**  
 256 **easily discriminated** from model-indistinguishable pairs, which helps reduce the false negative rate

257 caused by numerical precision. The difference between their embeddings is further magnified in  
 258 the pairwise contrastive training process if the model distinguishes them. However, the difference  
 259 remains unaffected mainly and is only influenced by numerical errors for model-indistinguishable  
 260 pairs. The training framework is illustrated in Fig 3(a).

## 261 4.2 Evaluation Method

262 Recall that our approach involves comparing the outputs on a pair of non-isomorphic graphs. If  
 263 there exists a notable disparity between them, we consider the GNN to be able to distinguish them.  
 264 However, determining an appropriate threshold poses a challenge. A large threshold may yield  
 265 false negatives where the model is expressive enough, but the observed difference falls short of  
 266 the threshold. Conversely, a small threshold may result in false positives, where the model fails to  
 267 distinguish the graphs. However, the fluctuating or numerical errors cause the difference to exceed  
 268 the small threshold.

269 To address the issue of fluctuating errors, we draw inspiration from Paired Comparisons [23]. It  
 270 involves comparing two groups of results instead of a single pair. The influence of random errors is  
 271 mitigated by repeatedly generating results and comparing the two groups of results. Building upon it,  
 272 we introduce a method called **Reliable Paired Comparison (RPC)** to verify whether a GNN genuinely  
 273 produces distinct outputs for a pair of graphs. The pipeline is depicted in Fig 3(b).

274 RPC consists of two main components: Major procedure and Reliability check. The Major procedure  
 275 is conducted on a pair of non-isomorphic graphs to measure their dissimilarity. In comparison,  
 276 the Reliability check is conducted on graph automorphisms to capture internal fluctuations with  
 277 numerical precision.

278 **Major procedure.** For two non-isomorphic graphs  $\mathcal{G}$  and  $\mathcal{H}$ , we create  $q$  copies of each by randomly  
 279 reindexing (operate permutation on node indexes, thus generating an isomorphic graph but with  
 280 different node orders) them. It results in two groups of graphs, where each copy is represented as:

$$\mathcal{G}_i, \mathcal{H}_i, i \in [q]. \quad (2)$$

281 Supposing the GNN  $f : \{\mathcal{G}\} \rightarrow \mathbb{R}^d$ , we first calculate  $q$  differences utilizing Paired Comparisons.

$$\mathbf{d}_i = f(\mathcal{G}_i) - f(\mathcal{H}_i), i \in [q]. \quad (3)$$

282 **Assumption 4.1.**  $\mathbf{d}_i$  are independent  $\mathcal{N}(\boldsymbol{\mu}, \boldsymbol{\Sigma})$  random vectors.

283 The above assumption is based on a more basic assumption that  $f(\mathcal{G}_i)$ ,  $f(\mathcal{H}_i)$  follow Gaussian  
 284 distributions, which presumes that random reindexing only introduces Gaussian noise to the result.

285 The mean difference between two graph embeddings  $\boldsymbol{\mu} = \mathbf{0}$  implies the GNN cannot distinguish them.  
 286 Therefore, we can obtain the distinguishing result by conducting an  $\alpha$ -level Hotelling's T-square test,  
 287 comparing the hypotheses  $H_0 : \boldsymbol{\mu} = \mathbf{0}$  against  $H_1 : \boldsymbol{\mu} \neq \mathbf{0}$ . We calculate the  $T^2$ -statistic for  $\boldsymbol{\mu}$  as:

$$T^2 = q(\bar{\mathbf{d}} - \boldsymbol{\mu})^T \mathbf{S}^{-1}(\bar{\mathbf{d}} - \boldsymbol{\mu}), \quad (4)$$

288 where

$$\bar{\mathbf{d}} = \frac{1}{q} \sum_{i=1}^q \mathbf{d}_i, \mathbf{S} = \frac{1}{q-1} \sum_{i=1}^q (\mathbf{d}_i - \bar{\mathbf{d}})(\mathbf{d}_i - \bar{\mathbf{d}})^T. \quad (5)$$

289 Hotelling's T-square test proves that  $T^2$  is distributed as an  $\frac{(q-1)d}{q-d} F_{d, q-d}$  random variable, whatever  
 290 the true  $\boldsymbol{\mu}$  and  $\boldsymbol{\Sigma}$  [36]. The theorem establishes a connection between the unknown parameter  $\boldsymbol{\mu}$  and a  
 291 definite probability distribution  $F_{d, q-d}$ , allowing us to confirm the confidence interval of  $\boldsymbol{\mu}$  by testing  
 292 the distribution fit. In order to test the hypothesis  $H_0 : \boldsymbol{\mu} = \mathbf{0}$ , we substitute  $\boldsymbol{\mu} = \mathbf{0}$  into Equation (4)  
 293 to obtain  $T_{\text{test}}^2 = q\bar{\mathbf{d}}^T \mathbf{S}^{-1}\bar{\mathbf{d}}$ . Then, for a specific  $\alpha$ , an  $\alpha$ -level test of  $H_0 : \boldsymbol{\mu} = \mathbf{0}$  versus  $H_1 : \boldsymbol{\mu} \neq \mathbf{0}$   
 294 for a population following  $\mathcal{N}(\boldsymbol{\mu}, \boldsymbol{\Sigma})$  distribution accepts  $H_0$  (the GNN cannot distinguish the pair) if:  
 295

$$T_{\text{test}}^2 = q\bar{\mathbf{d}}^T \mathbf{S}^{-1}\bar{\mathbf{d}} < \frac{(q-1)d}{(q-d)} F_{d, q-d}(\alpha), \quad (6)$$

296 where  $F_{d,q-d}(\alpha)$  is the upper  $(100\alpha)$ th percentile of the  $F$ -distribution  $F_{d,q-d}$  [37] with  $d$  and  $q-d$   
 297 degrees of freedom. Similarly, we reject  $H_0$  (the GNN can distinguish the pair) if

$$T_{\text{test}}^2 = q\bar{\mathbf{d}}^T \mathbf{S}^{-1}\bar{\mathbf{d}} > \frac{(q-1)d}{(q-d)} F_{d,q-d}(\alpha). \quad (7)$$

298 **Reliability check.** Although the above test is theoretically valid for evaluating the expressiveness  
 299 of GNNs, in practice, it is susceptible to computational precision limitations. These limitations can  
 300 manifest in various scenarios, such as comparing numbers close to zero or inverting a matrix close to  
 301 zero, making it difficult to rely on the test constantly. We incorporate the Reliability check to monitor  
 302 abnormal results to address this concern. This step effectively bridges the external difference between  
 303 two graphs and the internal fluctuations within a single graph.

304 WLOG, we replace  $\mathcal{H}$  by reindexing of  $\mathcal{G}$ , i.e.,  $\mathcal{G}^\pi$ . Thus, we can obtain the internal fluctuations  
 305 within  $\mathcal{G}$  by comparing it with  $\mathcal{G}^\pi$ , and the external difference between  $\mathcal{G}$  and  $\mathcal{H}$  by comparing  $\mathcal{G}$  and  
 306  $\mathcal{H}$ . We utilize the same step as Major procedure on  $\mathcal{G}$  and  $\mathcal{G}^\pi$ , calculating the  $T^2$ -statistics as follows:

$$T_{\text{reliability}}^2 = q\bar{\mathbf{d}}^T \mathbf{S}^{-1}\bar{\mathbf{d}}, \quad (8)$$

$$\text{where } \bar{\mathbf{d}} = \frac{1}{q} \sum_{i=1}^q \mathbf{d}_i, \mathbf{d}_i = f(\mathcal{G}_i) - f(\mathcal{G}_i^\pi), i \in [q], \mathbf{S} = \frac{1}{q-1} \sum_{i=1}^q (\mathbf{d}_i - \bar{\mathbf{d}})(\mathbf{d}_i - \bar{\mathbf{d}})^T. \quad (9)$$

307 Recalling that  $\mathcal{G}$  and  $\mathcal{G}^\pi$  are isomorphic, the GNN should not distinguish between them, implying  
 308 that  $\boldsymbol{\mu} = \mathbf{0}$ . Therefore, the test result is considered reliable only if  $T_{\text{reliability}}^2 < \frac{(q-1)d}{(q-d)} F_{d,q-d}(\alpha)$ .  
 309 Combining the reliability and distinguishability results, we get the complete RPC (Fig 3) as follows:

310 For each pair of graphs  $\mathcal{G}$  and  $\mathcal{H}$ , we first calculate the threshold value, denoted as  $\text{Threshold} =$   
 311  $\frac{(q-1)d}{(q-d)} F_{d,q-d}(\alpha)$ . Next, we conduct the Major procedure on  $\mathcal{G}$  and  $\mathcal{H}$  for distinguishability and  
 312 perform the Reliability check on  $\mathcal{G}$  and  $\mathcal{G}^\pi$  for Reliability. Only when the  $T^2$ -statistic from the Major  
 313 procedure, denoted as  $T_{\text{test}}^2$ , and the  $T^2$ -statistic from the Reliability check, denoted as  $T_{\text{reliability}}^2$ ,  
 314 satisfying  $T_{\text{reliability}}^2 < \text{Threshold} < T_{\text{test}}^2$ , do we conclude that the GNN can distinguishing  $\mathcal{G}$  and  $\mathcal{H}$ .

315 We further propose **Reliable Adaptive Pairwise Comparison (RAPC)**, aiming to adaptively adjust the  
 316 threshold and provide an upper bound for false positive rates. In practice, we use **RPC** due to its less  
 317 computational time and satisfactory performance. For more about RAPC, please refer to Appendix E.

## 318 5 Experiment

319 In this section, we evaluate the expressiveness of 23 representative models using our BREC dataset.

320 **Model selection.** We evaluate six categories of methods: non-GNN methods, subgraph-based GNNs,  
 321  $k$ -WL-hierarchy-based GNNs, substructure-based GNNs, transformer-based GNNs, and random  
 322 GNNs. Our primary focus will be on the first three categories. We implement four types of non-  
 323 GNN baselines based on Papp and Wattenhofer [17], Ying et al. [38], including WL test (3-WL and  
 324 SPD-WL), counting substructures ( $S_3$  and  $S_4$ ), neighborhood up to a certain radius ( $N_1$  and  $N_2$ ),  
 325 and marking ( $M_1$ ). We implemented them by adding additional features during the WL test update  
 326 or using heterogeneous message passing. It is important to note that they are more theoretically  
 327 significant than practical since they may require exhaustive enumeration or exact isomorphism  
 328 encoding of various substructures. We additionally included 16 state-of-the-art GNNs, including  
 329 NGNN [13], DE+NGNN [29], DS/DSS-GNN [10], SUN [15], SSWL\_P [16], GNN-AK [39], KP-  
 330 GNN [18], I<sup>2</sup>-GNN [19], PPGN [40],  $\delta$ -k-LGNN [41], KC-SetGNN [42], GSN [43], DropGNN [44],  
 331 OSAN [45], and Graphormer [38].

332 Table 2 presents the primary results.  $N_2$  achieves the highest accuracy among non-GNNs, and I<sup>2</sup>-GNN  
 333 achieves the highest among GNNs. We detail each method’s accuracy on different graphs, showing  
 334 that it matches theoretical results well. Detailed experiment settings are included in Appendix J.

335 **Non-GNN baselines.** 3-WL successfully distinguishes all Basic graphs, Extension graphs, simple  
 336 regular graphs and 60 CFI graphs as expected.  $S_3$ ,  $S_4$ ,  $N_1$ , and  $N_2$  demonstrate excellent performance  
 337 on small-radius graphs such as Basic, Regular, and Extension graphs. However, due to their limited  
 338 receptive fields, they struggle to distinguish large-radius graphs like CFI graphs. Noting that the



Table 2: Pair distinguishing accuracies on BREC

| Model               | Basic Graphs (60) |          | Regular Graphs (140) |          | Extension Graphs (100) |          | CFI Graphs (100) |          | Total (400) |          |
|---------------------|-------------------|----------|----------------------|----------|------------------------|----------|------------------|----------|-------------|----------|
|                     | Number            | Accuracy | Number               | Accuracy | Number                 | Accuracy | Number           | Accuracy | Number      | Accuracy |
| 3-WL                | 60                | 100%     | 50                   | 35.7%    | 100                    | 100%     | 60               | 60.0%    | 270         | 67.5%    |
| SPD-WL              | 16                | 26.7%    | 14                   | 11.7%    | 41                     | 41%      | 12               | 12%      | 83          | 20.8%    |
| $S_3$               | 52                | 86.7%    | 48                   | 34.3%    | 5                      | 5%       | 0                | 0%       | 105         | 26.2%    |
| $S_4$               | 60                | 100%     | 99                   | 70.7%    | 84                     | 84%      | 0                | 0%       | 243         | 60.8%    |
| $N_1$               | 60                | 100%     | 99                   | 85%      | 93                     | 93%      | 0                | 0%       | 252         | 63%      |
| $N_2$               | 60                | 100%     | 138                  | 98.6%    | 100                    | 100%     | 0                | 0%       | 298         | 74.5%    |
| $M_1$               | 60                | 100%     | 50                   | 35.7%    | 100                    | 100%     | 41               | 41%      | 251         | 62.8%    |
| NGNN                | 59                | 98.3%    | 48                   | 34.3%    | 59                     | 59%      | 0                | 0%       | 166         | 41.5%    |
| DE+NGNN             | 60                | 100%     | 50                   | 35.7%    | 100                    | 100%     | 21               | 21%      | 231         | 57.8%    |
| DS-GNN              | 58                | 96.7%    | 48                   | 34.3%    | 100                    | 100%     | 16               | 16%      | 222         | 55.5%    |
| DSS-GNN             | 58                | 96.7%    | 48                   | 34.3%    | 100                    | 100%     | 15               | 15%      | 221         | 55.2%    |
| SUN                 | 60                | 100%     | 50                   | 35.7%    | 100                    | 100%     | 13               | 13%      | 223         | 55.8%    |
| SSWL_P              | 60                | 100%     | 50                   | 35.7%    | 100                    | 100%     | 38               | 38%      | 248         | 62%      |
| GNN-AK              | 60                | 100%     | 50                   | 35.7%    | 97                     | 97%      | 15               | 15%      | 222         | 55.5%    |
| KP-GNN              | 60                | 100%     | 106                  | 75.7%    | 98                     | 98%      | 11               | 11%      | 275         | 68.8%    |
| I <sup>2</sup> -GNN | 60                | 100%     | 100                  | 71.4%    | 100                    | 100%     | 21               | 21%      | 281         | 70.2%    |
| PPGN                | 60                | 100%     | 50                   | 35.7%    | 100                    | 100%     | 23               | 23%      | 233         | 58.2%    |
| $\delta$ -k-LGNN    | 60                | 100%     | 50                   | 35.7%    | 100                    | 100%     | 6                | 6%       | 216         | 54%      |
| KC-SetGNN           | 60                | 100%     | 50                   | 35.7%    | 100                    | 100%     | 1                | 1%       | 211         | 52.8%    |
| GSN                 | 60                | 100%     | 99                   | 70.7%    | 95                     | 95%      | 0                | 0%       | 254         | 63.5%    |
| DropGNN             | 52                | 86.7%    | 41                   | 29.3%    | 82                     | 82%      | 2                | 2%       | 177         | 44.2%    |
| OSAN                | 56                | 93.3%    | 8                    | 5.7%     | 79                     | 79%      | 5                | 5%       | 148         | 37%      |
| Graphormer          | 16                | 26.7%    | 12                   | 10%      | 41                     | 41%      | 10               | 10%      | 79          | 19.8%    |

expressiveness of  $S_3$  and  $S_4$  is bounded by  $N_1$  and  $N_2$ , respectively, as analyzed by Papp and Wattenhofer [17]. Conversely,  $M_1$  is implemented by heterogeneous message passing, which makes it unaffected by large graph diameters, thus maintaining its performance across different graphs. SPD-WL is another 1-WL extension operated on a complete graph with shortest path distances as edge features. It may degrade to 1-WL on low-radius graphs, causing its relatively poor performance.

**Subgraph-based GNNs.** Regarding subgraph-based models, they can generally distinguish almost all Basic graphs, simple regular graphs and Extension graphs. However, an exception lies with NGNN, which performs poorly in Extension graphs due to its simplicial node selection policy and lack of node labeling. Two other exceptions are KP-GNN and I<sup>2</sup>-GNN, both exhibiting exceptional performance in Regular graphs. KP-GNN can differentiate a substantial number of strongly regular graphs and 4-vertex condition graphs, surpassing the 3-WL partially. And I<sup>2</sup>-GNN surpasses the limitations of 3-WL partially through its enhanced cycle-counting power. An influential aspect that impacts the performance is the subgraph radius. Approaches incorporating appropriate encoding functions are expected to yield superior performance as the subgraph radius increases. However, in practice, enlarging the radius may result in the smoothness of information, wherein the receptive field expands, encompassing some irrelevant or noisy information. Hence, we treat the subgraph radius as a hyperparameter, fine-tuning it for each model, and present the best results in Table 2. Please refer to Appendix F for further details regarding the radius selection.

When comparing various subgraph GNNs, KP-GNN can discriminate part of the strongly regular graphs by peripheral subgraphs. Additionally, distance encoding in DE+NGNN and I<sup>2</sup>-GNN enables better discrimination among different hops within a given subgraph radius, enhancing the discriminative ability, particularly in larger subgraph radii. As for DS-GNN, DSS-GNN, GNN-AK, SUN and SSWL\_P, they employ similar aggregation schemes with slight variations in their operations. These models exhibit comparable performance, with SSWL\_P outperforming others, which aligns with expectations since SSWL\_P is more expressive but with the least components.

**$k$ -WL hierarchy-based GNNs.** For the  $k$ -WL-hierarchy-based models, we adopt two implemented approaches: high-order simulation and local-WL simulation. PPGN serves as the representative work for the former, while  $\delta$ -k-LGNN and KCSet-GNN embody the latter. PPGN aligns its performance with 3-WL across all graphs except for CFI graphs. For CFI graphs with large radii, more WL iterations (layers of GNNs) are required. However, employing many layers may lead to over-smoothing, resulting in a gap between theoretical expectations and actual performance. Nonetheless, PPGN still surpasses most GNNs in CFI graphs due to global  $k$ -WL’s global receptive field. For  $\delta$ -k-LGNN, we set  $k = 2$ , while for KCSet-GNN, we set  $k = 3, c = 2$  to simulate local 3-WL, adhering to the original configuration. By comparing the output results with relatively small diameters, we observed that local WL matches the performance of general  $k$ -WL. However, local WL exhibits lower performance for CFI graphs with larger radii due to insufficient receptive fields.

375 **Substructure-based GNNs** For substructure-based GNNs, we select GSN, which incorporate sub-  
376 structure isomorphism counting as features. The best result obtained for GSN-e is reported when  
377 setting  $k = 4$ . For further exploration of policy and size, please refer to Appendix H.

378 **Random GNNs** Random GNNs are unsuitable for GI problems since even identical graphs can yield  
379 different outcomes due to inherent randomness. However, the RPC can quantify fluctuations in the  
380 randomization process, thereby enabling the testing of random GNNs. We test DropGNN and OSAN.  
381 For more information regarding the crucial factor of random samples, please refer to Appendix I.

382 **Transformer-based GNNs** For transformer-based GNNs, we select graphormer, which is anticipated  
383 to possess a level of expressiveness comparable to SPD-WL. The experimental results verify that.

## 384 6 Conclusion and Future Work

385 This paper proposes a new dataset, BREC, for GNN expressiveness comparison. BREC addresses  
386 the limitations of previous datasets, including difficulty, granularity, and scale, by incorporating  
387 400 pairs of diverse graphs in four categories. A new evaluation method is proposed for principled  
388 expressiveness evaluation. Finally, a thorough comparison of 23 baselines on BREC is conducted.

389 Apart from the expressiveness comparison based on GI, there are various other metrics for GNN  
390 expressiveness evaluation, such as substructure counting, diameter counting, and biconnectivity  
391 checking. However, it’s worth noting that these tests are often conducted on datasets not specifically  
392 designed for expressiveness [19, 39, 46], which can lead to biased results caused by spurious  
393 correlations. In other words, certain methods may struggle to identify a particular substructure,  
394 but they can capture another property that correlates with substructures, resulting in false high  
395 performance. This problem can be alleviated in BREC because of the difficulty. We reveal the  
396 data generation process of BREC in Appendix K, hoping that researchers can utilize them in more  
397 tasks. We also hope the test of practical expressiveness will aid researchers in exploring its effects on  
398 performance in real datasets and other domains.

## 399 References

- 400 [1] David K Duvenaud, Dougal Maclaurin, Jorge Iparraguirre, Rafael Bombarell, Timothy Hirzel,  
401 Alán Aspuru-Guzik, and Ryan P Adams. Convolutional networks on graphs for learning  
402 molecular fingerprints. *Advances in neural information processing systems*, 28, 2015.
- 403 [2] Albert-László Barabási, Natali Gulbahce, and Joseph Loscalzo. Network medicine: a network-  
404 based approach to human disease. *Nature reviews genetics*, 12(1):56–68, 2011.
- 405 [3] Wenqi Fan, Yao Ma, Qing Li, Yuan He, Eric Zhao, Jiliang Tang, and Dawei Yin. Graph neural  
406 networks for social recommendation. In *The world wide web conference*, pages 417–426, 2019.
- 407 [4] Hongwei Wang, Fuzheng Zhang, Jialin Wang, Miao Zhao, Wenjie Li, Xing Xie, and Minyi  
408 Guo. Ripplenet: Propagating user preferences on the knowledge graph for recommender sys-  
409 tems. In *Proceedings of the 27th ACM international conference on information and knowledge  
410 management*, pages 417–426, 2018.
- 411 [5] Rianne van den Berg, Thomas N Kipf, and Max Welling. Graph convolutional matrix completion.  
412 *arXiv preprint arXiv:1706.02263*, 2017.
- 413 [6] Jie Zhou, Ganqu Cui, Shengding Hu, Zhengyan Zhang, Cheng Yang, Zhiyuan Liu, Lifeng  
414 Wang, Changcheng Li, and Maosong Sun. Graph neural networks: A review of methods and  
415 applications. *AI open*, 1:57–81, 2020.
- 416 [7] Keyulu Xu, Weihua Hu, Jure Leskovec, and Stefanie Jegelka. How powerful are graph neural  
417 networks? In *7th International Conference on Learning Representations, ICLR 2019, New  
418 Orleans, LA, USA, May 6-9, 2019, Conference Track Proceedings*. OpenReview.net, 2019.  
419 URL <https://openreview.net/forum?id=ryGs6iA5Km>.
- 420 [8] Christopher Morris, Martin Ritzert, Matthias Fey, William L Hamilton, Jan Eric Lenssen,  
421 Gaurav Rattan, and Martin Grohe. Weisfeiler and leman go neural: Higher-order graph neural  
422 networks. In *Proceedings of the AAAI conference on artificial intelligence*, volume 33, pages  
423 4602–4609, 2019.

- 424 [9] Muhammet Balcilar, Pierre H eroux, Benoit Gauzere, Pascal Vasseur, S ebastien Adam, and  
425 Paul Honeine. Breaking the limits of message passing graph neural networks. In International  
426 Conference on Machine Learning, pages 599–608. PMLR, 2021.
- 427 [10] Beatrice Bevilacqua, Fabrizio Frasca, Derek Lim, Balasubramaniam Srinivasan, Chen Cai,  
428 Gopinath Balamurugan, Michael M. Bronstein, and Haggai Maron. Equivariant subgraph aggrega-  
429 tion networks. In The Tenth International Conference on Learning Representations, ICLR  
430 2022, Virtual Event, April 25-29, 2022. OpenReview.net, 2022. URL [https://openreview.  
431 net/forum?id=dFbKQaRk15w](https://openreview.net/forum?id=dFbKQaRk15w).
- 432 [11] Leonardo Cotta, Christopher Morris, and Bruno Ribeiro. Reconstruction for powerful graph  
433 representations. Advances in Neural Information Processing Systems, 34:1713–1726, 2021.
- 434 [12] Jiaxuan You, Jonathan M Gomes-Selman, Rex Ying, and Jure Leskovec. Identity-aware graph  
435 neural networks. In Proceedings of the AAAI conference on artificial intelligence, volume 35,  
436 pages 10737–10745, 2021.
- 437 [13] Muhan Zhang and Pan Li. Nested graph neural networks. Advances in Neural Information  
438 Processing Systems, 34:15734–15747, 2021.
- 439 [14] Haggai Maron, Heli Ben-Hamu, Nadav Shamir, and Yaron Lipman. Invariant and equivariant  
440 graph networks. In 7th International Conference on Learning Representations, ICLR 2019,  
441 New Orleans, LA, USA, May 6-9, 2019. OpenReview.net, 2019. URL [https://openreview.  
442 net/forum?id=Syx72jC9tm](https://openreview.net/forum?id=Syx72jC9tm).
- 443 [15] Fabrizio Frasca, Beatrice Bevilacqua, Michael Bronstein, and Haggai Maron. Understanding  
444 and extending subgraph gnns by rethinking their symmetries. Advances in Neural Information  
445 Processing Systems, 35:31376–31390, 2022.
- 446 [16] Bohang Zhang, Guhao Feng, Yiheng Du, Di He, and Liwei Wang. A complete expressive-  
447 ness hierarchy for subgraph GNNs via subgraph weisfeiler-lehman tests. In Andreas Krause,  
448 Emma Brunskill, Kyunghyun Cho, Barbara Engelhardt, Sivan Sabato, and Jonathan Scarlett,  
449 editors, Proceedings of the 40th International Conference on Machine Learning, volume 202  
450 of Proceedings of Machine Learning Research, pages 41019–41077. PMLR, 23–29 Jul 2023.  
451 URL <https://proceedings.mlr.press/v202/zhang23k.html>.
- 452 [17] P al Andr as Papp and Roger Wattenhofer. A theoretical comparison of graph neural network  
453 extensions. In International Conference on Machine Learning, pages 17323–17345. PMLR,  
454 2022.
- 455 [18] Jiarui Feng, Yixin Chen, Fuhai Li, Anindya Sarkar, and Muhan Zhang. How powerful are k-hop  
456 message passing graph neural networks. In Alice H. Oh, Alekh Agarwal, Danielle Belgrave,  
457 and Kyunghyun Cho, editors, Advances in Neural Information Processing Systems, 2022. URL  
458 <https://openreview.net/forum?id=nN3aVRQsxGd>.
- 459 [19] Yinan Huang, Xingang Peng, Jianzhu Ma, and Muhan Zhang. Boosting the cycle counting  
460 power of graph neural networks with  $i\hat{S}^2\hat{S}$ -gnns. In The Eleventh International Conference  
461 on Learning Representations, ICLR 2023, Kigali, Rwanda, May 1-5, 2023. OpenReview.net,  
462 2023. URL <https://openreview.net/pdf?id=kDSmx0spsXQ>.
- 463 [20] Bohang Zhang, Shengjie Luo, Liwei Wang, and Di He. Rethinking the expressive power  
464 of gnns via graph biconnectivity. In The Eleventh International Conference on Learning  
465 Representations, 2023.
- 466 [21] Ralph Abboud, İsmail İlkan Ceylan, Martin Grohe, and Thomas Lukasiewicz. The surprising  
467 power of graph neural networks with random node initialization. In Zhi-Hua Zhou, editor,  
468 Proceedings of the Thirtieth International Joint Conference on Artificial Intelligence, IJCAI  
469 2021, Virtual Event / Montreal, Canada, 19-27 August 2021, pages 2112–2118. ijcai.org, 2021.  
470 doi: 10.24963/ijcai.2021/291. URL <https://doi.org/10.24963/ijcai.2021/291>.
- 471 [22] Ryan Murphy, Balasubramaniam Srinivasan, Vinayak Rao, and Bruno Ribeiro. Relational  
472 pooling for graph representations. In International Conference on Machine Learning, pages  
473 4663–4673. PMLR, 2019.

- 474 [23] Ronald Aylmer Fisher. Statistical methods for research workers. Springer, 1992.
- 475 [24] Richard A. Johnson and Dean W. Wichern. Applied multivariate statistical analysis. Pearson  
476 Prentice Hall, Upper Saddle River, N.J., 6th ed edition, 2007. ISBN 978-0-13-187715-3. OCLC:  
477 ocm70867129.
- 478 [25] Zhengdao Chen, Soledad Villar, Lei Chen, and Joan Bruna. On the equivalence between graph  
479 isomorphism testing and function approximation with gnns. Advances in neural information  
480 processing systems, 32, 2019.
- 481 [26] Floris Geerts and Juan L. Reutter. Expressiveness and approximation properties of graph neural  
482 networks. In The Tenth International Conference on Learning Representations, ICLR 2022,  
483 Virtual Event, April 25-29, 2022. OpenReview.net, 2022. URL [https://openreview.net/  
484 forum?id=wIzUeM3TAU](https://openreview.net/forum?id=wIzUeM3TAU).
- 485 [27] Boris Weisfeiler and Andrei Leman. The reduction of a graph to canonical form and the algebra  
486 which appears therein. nti, Series, 2(9):12–16, 1968.
- 487 [28] J.-Y. Cai, M. Furer, and N. Immerman. An optimal lower bound on the number of variables for  
488 graph identification. In 30th Annual Symposium on Foundations of Computer Science, pages  
489 612–617, 1989. doi: 10.1109/SFCS.1989.63543.
- 490 [29] Pan Li, Yanbang Wang, Hongwei Wang, and Jure Leskovec. Distance encoding: Design  
491 provably more powerful neural networks for graph representation learning. Advances in Neural  
492 Information Processing Systems, 33:4465–4478, 2020.
- 493 [30] A. E. Brouwer, F. Ihringer, and W. M. Kantor. Strongly regular graphs satisfying the 4-vertex  
494 condition. Combinatorica, 43(2):257–276, apr 2023. doi: 10.1007/s00493-023-00005-y. URL  
495 <https://doi.org/10.1007%2Fs00493-023-00005-y>.
- 496 [31] Andries E Brouwer, Willem H Haemers, Andries E Brouwer, and Willem H Haemers. Strongly  
497 regular graphs. Spectra of graphs, pages 115–149, 2012.
- 498 [32] Andries E Brouwer, Willem H Haemers, Andries E Brouwer, and Willem H Haemers.  
499 Distance-regular graphs. Springer, 2012.
- 500 [33] Gregory Koch, Richard Zemel, Ruslan Salakhutdinov, et al. Siamese neural networks for  
501 one-shot image recognition. In ICML deep learning workshop, volume 2. Lille, 2015.
- 502 [34] Raia Hadsell, Sumit Chopra, and Yann LeCun. Dimensionality reduction by learning an  
503 invariant mapping. In 2006 IEEE Computer Society Conference on Computer Vision and  
504 Pattern Recognition (CVPR’06), volume 2, pages 1735–1742. IEEE, 2006.
- 505 [35] Hao Wang, Yitong Wang, Zheng Zhou, Xing Ji, Dihong Gong, Jingchao Zhou, Zhifeng Li, and  
506 Wei Liu. Cosface: Large margin cosine loss for deep face recognition. In Proceedings of the  
507 IEEE conference on computer vision and pattern recognition, pages 5265–5274, 2018.
- 508 [36] Harold Hotelling. The generalization of student’s ratio. In Breakthroughs in statistics:  
509 Foundations and basic theory, pages 54–65. Springer, 1992.
- 510 [37] Ronald Aylmer Fisher. Contributions to mathematical statistics. 1950.
- 511 [38] Chengxuan Ying, Tianle Cai, Shengjie Luo, Shuxin Zheng, Guolin Ke, Di He, Yanming Shen,  
512 and Tie-Yan Liu. Do transformers really perform badly for graph representation? Advances in  
513 Neural Information Processing Systems, 34:28877–28888, 2021.
- 514 [39] Lingxiao Zhao, Wei Jin, Leman Akoglu, and Neil Shah. From stars to subgraphs: Uplifting any  
515 GNN with local structure awareness. In International Conference on Learning Representations,  
516 2022. URL [https://openreview.net/forum?id=Mspk\\_WYKoEH](https://openreview.net/forum?id=Mspk_WYKoEH).
- 517 [40] Haggai Maron, Heli Ben-Hamu, Hadar Serviansky, and Yaron Lipman. Provably powerful  
518 graph networks. Advances in neural information processing systems, 32, 2019.

- 519 [41] Christopher Morris, Gaurav Rattan, and Petra Mutzel. Weisfeiler and leman go sparse: Towards  
520 scalable higher-order graph embeddings. Advances in Neural Information Processing Systems,  
521 33:21824–21840, 2020.
- 522 [42] Lingxiao Zhao, Neil Shah, and Leman Akoglu. A practical, progressively-expressive gnn.  
523 Advances in Neural Information Processing Systems, 35:34106–34120, 2022.
- 524 [43] Giorgos Bouritsas, Fabrizio Frasca, Stefanos Zafeiriou, and Michael M Bronstein. Improving  
525 graph neural network expressivity via subgraph isomorphism counting. IEEE Transactions on  
526 Pattern Analysis and Machine Intelligence, 45(1):657–668, 2022.
- 527 [44] Pál András Papp, Karolis Martinkus, Lukas Faber, and Roger Wattenhofer. Dropgnn: Random  
528 dropouts increase the expressiveness of graph neural networks. Advances in Neural Information  
529 Processing Systems, 34:21997–22009, 2021.
- 530 [45] Chendi Qian, Gaurav Rattan, Floris Geerts, Mathias Niepert, and Christopher Morris. Ordered  
531 subgraph aggregation networks. Advances in Neural Information Processing Systems, 35:  
532 21030–21045, 2022.
- 533 [46] Zhengdao Chen, Lei Chen, Soledad Villar, and Joan Bruna. Can graph neural networks count  
534 substructures? Advances in neural information processing systems, 33:10383–10395, 2020.
- 535 [47] László Babai and Ludik Kucera. Canonical labelling of graphs in linear average time. In 20th  
536 Annual Symposium on Foundations of Computer Science (sfcs 1979), pages 39–46. IEEE,  
537 1979.
- 538 [48] Ryoma Sato. A survey on the expressive power of graph neural networks. arXiv preprint  
539 arXiv:2003.04078, 2020.
- 540 [49] Ningyuan Teresa Huang and Soledad Villar. A short tutorial on the weisfeiler-lehman test and  
541 its variants. In ICASSP 2021-2021 IEEE International Conference on Acoustics, Speech and  
542 Signal Processing (ICASSP), pages 8533–8537. IEEE, 2021.

## 543 Checklist

- 544 1. For all authors...
- 545 (a) Do the main claims made in the abstract and introduction accurately reflect the paper’s  
546 contributions and scope? [Yes] We elucidate the constraints inherent in prior datasets  
547 pertaining to expressiveness and present a novel dataset along with comprehensive  
548 experiments.
- 549 (b) Did you describe the limitations of your work? [Yes] We refer to alternative metrics  
550 for assessing expressiveness and welcome additional experiments on our foundational  
551 dataset (shown in Section 6)
- 552 (c) Did you discuss any potential negative societal impacts of your work? [N/A] All data  
553 points are synthetic.
- 554 (d) Have you read the ethics review guidelines and ensured that your paper conforms to  
555 them? [Yes]
- 556 2. If you are including theoretical results...
- 557 (a) Did you state the full set of assumptions of all theoretical results? [Yes] Please refer to  
558 assumption 4.1.
- 559 (b) Did you include complete proofs of all theoretical results? [Yes] Please refer to proof E.
- 560 3. If you ran experiments (e.g. for benchmarks)...
- 561 (a) Did you include the code, data, and instructions needed to reproduce the main experi-  
562 mental results (either in the supplemental material or as a URL)? [Yes] Please refer to  
563 <https://github.com/GraphPKU/BREC>
- 564 (b) Did you specify all the training details (e.g., data splits, hyperparameters, how they  
565 were chosen)? [Yes] Please refer to Appendix J

- 566 (c) Did you report error bars (e.g., with respect to the random seed after running experi-  
567 ments multiple times)? [Yes] Please refer to Appendix J
- 568 (d) Did you include the total amount of compute and the type of resources used (e.g., type  
569 of GPUs, internal cluster, or cloud provider)? [Yes] Please refer to Appendix J
- 570 4. If you are using existing assets (e.g., code, data, models) or curating/releasing new assets...
- 571 (a) If your work uses existing assets, did you cite the creators? [Yes]
- 572 (b) Did you mention the license of the assets? [Yes] All assets were openly accessible, and  
573 the licenses for each asset were retained in the corresponding repositories. For more  
574 details, please refer to <https://github.com/GraphPKU/BREC>.
- 575 (c) Did you include any new assets either in the supplemental material or as a URL? [Yes]  
576 Please refer to <https://github.com/GraphPKU/BREC>
- 577 (d) Did you discuss whether and how consent was obtained from people whose data you're  
578 using/curating? [N/A] All assets were openly accessible.
- 579 (e) Did you discuss whether the data you are using/curating contains personally identifiable  
580 information or offensive content? [N/A] All data points are synthetic.
- 581 5. If you used crowdsourcing or conducted research with human subjects...
- 582 (a) Did you include the full text of instructions given to participants and screenshots, if  
583 applicable? [N/A] No utilization of crowdsourcing or engagement in research with  
584 human subjects took place.
- 585 (b) Did you describe any potential participant risks, with links to Institutional Review Board  
586 (IRB) approvals, if applicable? [N/A] No utilization of crowdsourcing or engagement  
587 in research with human subjects took place.
- 588 (c) Did you include the estimated hourly wage paid to participants and the total amount  
589 spent on participant compensation? [N/A] No utilization of crowdsourcing or engage-  
590 ment in research with human subjects took place.

## 591 A Details on Regular Graphs

592 In this section, we introduce the relationship between four types of regular graphs. The inclusion  
 593 relations of them are shown in Figure 4, but their difficulty relations and inclusion relations are not  
 594 consistent.

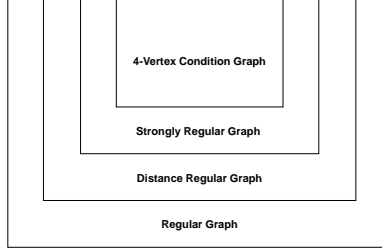

Figure 4: Regular graphs relationship

595 A graph is deemed a regular graph when all of its vertices possess an identical degree. If a regular  
 596 graph, with  $v$  vertices and degree  $k$ , satisfies the additional conditions wherein any two adjacent  
 597 vertices share  $\lambda$  common neighbors, and any two non-adjacent vertices share  $\mu$  common neighbors, it  
 598 is categorized as a strongly regular graph. Hence, it can be represented as  $\text{srg}(v, k, \lambda, \mu)$ , denoting its  
 599 four associated parameters.

600 Regular graphs and strongly regular graphs find wide application in expressiveness analysis. The  
 601 difficulty of strongly regular graphs surpasses that of general regular graphs due to the imposition  
 602 of additional requirements. Notably, the simplest strongly regular graphs with identical parameters  
 603 ( $\text{srg}(16, 6, 2, 2)$ ) are exemplified by the Shrikhande graph and the  $4 \times 4$ -Rook’s graph, as depicted in  
 604 Figure 2(c).

605 Both 4-vertex condition graphs and distance regular graphs introduce heightened complexities, albeit  
 606 in opposing directions. A 4-vertex condition graph is a strongly regular graph with an additional  
 607 property that mandates the determination of the number of edges between the common neighbors  
 608 of two vertices based on their connectivity. Conversely, distance regular graphs expand upon the  
 609 definition of strongly regular graphs by specifying that for any two vertices  $v$  and  $w$ , the count of  
 610 vertices at a distance  $j$  from  $v$  and at a distance  $k$  from  $w$  relies solely on  $j$ ,  $k$ , and the distance  
 611 between  $v$  and  $w$ . Notably, a distance regular graph with a radius of 2 is equivalent to a strongly  
 612 regular graph.

613 The 4-vertex condition graph has yet to be explored in previous research endeavors. Similarly,  
 614 instances of distance regular graphs are relatively scarce and analyzing them through examples proves  
 615 to be challenging. To encourage further research in these domains, we have incorporated them into  
 616 BREC.

## 617 B Node Features

618 In this section, we present the concept of node features and edge features in graphs.

619 We commence by providing the definition of graphs using an adjacency matrix representation.  
 620 Consider a graph where the node features are represented by a  $d_n$ -dimensional vector, and the edge  
 621 features are represented by a  $d_e$ -dimensional vector. This graph can be denoted as  $\mathcal{G} = (\mathbf{V}(\mathcal{G}), \mathbf{E}(\mathcal{G}))$ ,  
 622 where  $\mathbf{V}(\mathcal{G}) \in \mathbb{R}^{n \times d_n}$  represents the node features, and  $\mathbf{E}(\mathcal{G}) \in \mathbb{R}^{n \times n \times (d_e + 1)}$  represents the edge  
 623 features, with  $n$  being the number of nodes in the graph. The adjacency matrix of the graph is denoted  
 624 as  $\mathbf{A}(\mathcal{G}) \in \mathbb{R}^{n \times n} = \mathbf{E}(\mathcal{G})_{:, :, (d_e + 1)}$ , where  $\mathbf{A}(\mathcal{G})_{i, j} = 1$  if  $(i, j) \in \mathbb{E}(\mathcal{G})$  (i.e., if nodes  $i$  and  $j$  are  
 625 connected by an edge), otherwise  $\mathbf{A}(\mathcal{G})_{i, j} = 0$ . The feature of node  $i$  is represented by  $V(\mathcal{G})_{i, :}$ , and  
 626 the feature of edge  $(i, j)$  is represented by  $E(\mathcal{G})_{i, j, 1: d_e}$ . The permutation (or reindexing) of  $\mathcal{G}$  is  
 627 denoted as  $\mathcal{G}^\pi = (\mathbf{V}(\mathcal{G}), \mathbf{E}(\mathcal{G}))$  with permutation  $\pi : [n] \rightarrow [n]$ , such that  $V(\mathcal{G})_{i, :} = V(\mathcal{G})_{\pi(i), :}$ ; and  
 628  $E(\mathcal{G})_{i, j, :} = E(\mathcal{G})_{\pi(i), \pi(j), :}$ .

629 Next, we explore the utilization of features. It is evident that incorporating node features during  
 630 initialization and edge features during message passing can enhance the performance of GNNs, given

631 appropriate hyperparameters and training. However, we should consider whether features can truly  
632 represent graph structures or provide additional expressiveness. Let us categorize features into two  
633 types.

634 The first type involves fully utilizing the original features, such as distances to other nodes or spectral  
635 embeddings. While using these features can aid GNNs in solving Graph Isomorphism (GI) problems,  
636 this type of feature requires a dedicated design to effectively utilize them. For instance, if we aim  
637 to recognize a 6-cycle in a graph, we can manually identify the cycle and assign distinct features to  
638 each node within the cycle. In this way, the GNN can recognize the cycle by aggregating the six  
639 distinctive features. However, the injecting strategy influences expressiveness and requires further  
640 analysis. Utilizing distance can also enhance expressiveness but also need a suitable design (like  
641 subgraph distance encoding and SPD-WL).

642 The second type entails incorporating additional features, such as manually selected node identifiers.  
643 It is important to note that this improvement stems from reduced difficulty rather than increased  
644 expressiveness. For instance, given a pair of non-isomorphic graphs with high similarity, we can  
645 manually find the components causing the distinguishing difficulty and assign identifiers to help  
646 models overcome them. However, this process is generally unavailable in practice.

647 In summary, we can conclude that features have the potential to introduce expressiveness, but this  
648 should be accomplished through model design rather than relying solely on the dataset. In the case  
649 of BREC, a dataset created specifically for testing expressiveness, we do not include additional  
650 meaningful features. Instead, we employ the same vector for all node features and edge features and  
651 adhere to specific model settings to incorporate graph-specific features, such as the distance between  
652 nodes in distance encoding based models.

## 653 C WL Algorithm

654 This section briefly introduces the WL algorithm and two high-order variants.

655 The 1-WL algorithm, short for "1-Weisfeiler-Lehman," is an initial version of the WL algorithm. It  
656 serves as a graph isomorphism algorithm and can be employed to generate a distinctive label for each  
657 graph.

658 In the 1-WL algorithm, every node in the graph maintains a state or color, which undergoes refinement  
659 during each iteration by incorporating information from the states of its neighboring nodes. As the  
660 algorithm progresses, the graph representation evolves into a multiset of node states, ultimately  
661 converging to a final representation.

662 To circumvent these examples, researchers have devised a technique to augment each node in the 1-  
663 WL test, resulting in the development of the  $k$ -WL test [47? ]. The  $k$ -dimensional Weisfeiler-Lehman  
664 test expands the scope of the test to consider colorings of  $k$ -tuples of nodes instead of individual  
665 nodes. This extension allows for a more comprehensive analysis of graph structures and assists in  
666 overcoming the limitations posed by certain examples.

667 In addition to the  $k$ -WL test, Cai et al. [28] proposed an alternative WL test algorithm that also  
668 extends to  $k$ -tuples. This variant is commonly referred to as the  $k$ -FWL ( $k$ -folklore-WL) test. The  
669  $k$ -FWL test differs from the  $k$ -WL test in terms of how neighbors are defined and the order in which  
670 aggregation is performed on tuples and multisets.

671 There are three notable results associated with these tests:

- 672 1 1-WL = 2-WL
- 673 2  $k$ -WL  $>$   $(k - 1)$ -WL,  $(k > 2)$
- 674 3  $(k - 1)$ -FWL =  $k$ -WL

675 More details can be found in Sato [48], Huang and Villar [49].

## 676 D BREC Statistics

677 Here we give some statistics of the BREC dataset, shown in Figure 5.



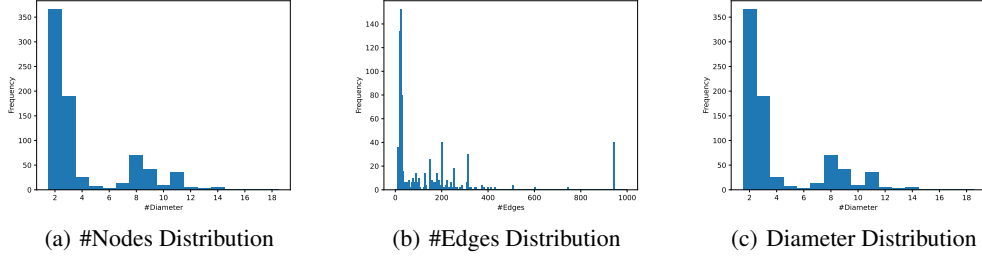

Figure 5: BREC Statistics

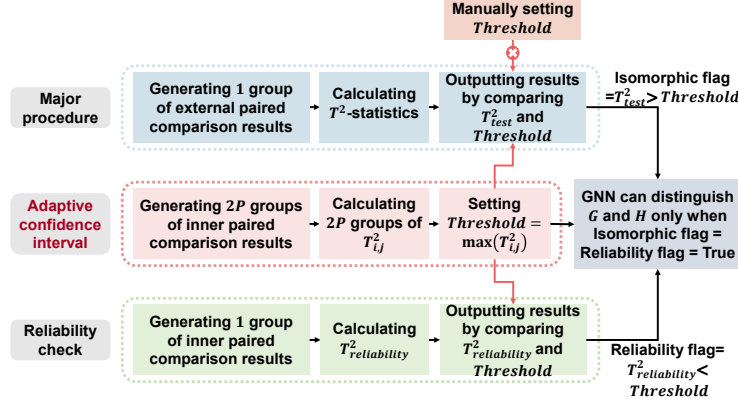

Figure 6: RAPC pipeline.

## 678 E RAPC: a Reliable and Adaptive Evaluation Method

679 In this section, we propose RAPC with an additional stage called adaptive confidence interval based  
 680 on RPC. Though RPC performs excellently in experiments with a general theoretical guarantee in  
 681 reliability, with manually setting  $\alpha$ . We still want to make the procedure more automated. In addition,  
 682 we found that the inner fluctuations of each pair, i.e.  $T_{reliability}^2$ , vary from pairs. This means some  
 683 graph outputs are more stable than others, and their threshold can be larger than others. However, it  
 684 is impossible to manually set the confidence interval ( $\alpha$ ) for all pairs, thus, we propose an adaptive  
 685 confidence interval method to solve this problem. The key idea is to set the threshold according to  
 686 minimum internal fluctuations.

687 Given a pair of non-isomorphic graphs  $\mathcal{G}$  and  $\mathcal{H}$  to be tested. For simplicity, we rename  $\mathcal{G}$  as  $\mathcal{G}_1$ ,  $\mathcal{H}$   
 688 as  $\mathcal{G}_2$ . For each graph ( $\mathcal{G}_1$  and  $\mathcal{G}_2$ ), we generate  $p$  groups of graphs, with each group containing  $2q$   
 689 graphs, represented by:

$$\mathcal{G}_{i,j,k}, i \in [2], j \in [p], k \in [2q]. \quad (10)$$

690 Similarly, we can calculate  $T^2$ -statistics for each group ( $2p$  groups in total):

$$T_{i,j}^2 = q\bar{\mathbf{d}}_{i,j}^T \mathbf{S}_{i,j} \bar{\mathbf{d}}_{i,j}, i \in [2], j \in [p]. \quad (11)$$

691 where

$$\begin{aligned} \bar{\mathbf{d}}_{i,j} &= \frac{1}{q} \sum_{k=1}^q \mathbf{d}_{i,j,k}, \mathbf{d}_{i,j,k} = f(\mathcal{G}_{i,j,k}) - f(\mathcal{G}_{i,j,k+q}), i \in [2], j \in [p], k \in [q], \\ \mathbf{S}_{i,j} &= \frac{1}{q-1} \sum_{j=1}^q (\mathbf{d}_{i,j,k} - \bar{\mathbf{d}}_{i,j})(\mathbf{d}_{i,j,k} - \bar{\mathbf{d}}_{i,j})^T. \end{aligned} \quad (12)$$

692 Similar to major procedure, we can conduct an  $\alpha$ -level test of  $H_0 : \delta = \mathbf{0}$  versus  $H_1 : \delta \neq \mathbf{0}$ , it  
 693 should always accept  $H_0$ (the GNN cannot distinguish them) since the  $2q$  graphs in each group are  
 694 essentially the same. And  $T^2$ -statistics should satisfy the:

$$T_{i,j}^2 = q\bar{\mathbf{d}}_{i,j}^T \mathbf{S}_{i,j} \bar{\mathbf{d}}_{i,j} < \frac{(q-1)n}{(q-n)} F_{n,q-n}(\alpha). \quad (13)$$

Table 3: A general theoretical expressiveness upper bound of subgraph with radius  $k$

| Radius            | 1   | 2   | 3   | 4   | 5   | 6   | 7   | 8   | 9   | 10  |
|-------------------|-----|-----|-----|-----|-----|-----|-----|-----|-----|-----|
| #Accurate on BREC | 252 | 298 | 300 | 327 | 326 | 385 | 398 | 398 | 399 | 400 |

695 If the GNN can distinguish the pair,  $T_{\text{test}}^2$  in major procedure and  $T_{i,j}^2$  in adaptive confidence interval  
 696 should satisfy the:

$$T_{\text{test}}^2 > \frac{(q-1)n}{(q-n)} F_{n,q-n}(\alpha) > T_{i,j}^2, \forall i \in [2], j \in [p]. \quad (14)$$

697 Thus we set the adaptive confidence interval as  $\text{Threshold} = \text{Max}_{i \in \{1,2\}, p \in \{1, \dots, P\}} \{T_{i,p}^2\}$ . Then we  
 698 conduct Major Procedure and Reliability Check based on Threshold similar to RPC. The pipeline is  
 699 shown in Fig 6.

700 In our analysis of the current evaluation method, we take into account the probabilities of false  
 701 positives and false negatives. Typically, achieving extremely low levels of both probabilities simulta-  
 702 neously is challenging, and there is often a trade-off between them. However, since false positives  
 703 can undermine the reliability of the methods, we prioritize establishing stringent bounds for this type  
 704 of error. On the other hand, false negatives are explained in a more intuitive manner, acknowledging  
 705 their presence but placing greater emphasis on minimizing false positives.

706 Regarding false positives, we give the following theorem.

707 **Theorem E.1.** *The false positive rate with adaptive confidence interval is  $\frac{1}{2^{2P}}$ .*

708 *Proof.* We first define false positives more formally. False positives mean the GNN  $f$  cannot  
 709 distinguish  $\mathcal{G}$  and  $\mathcal{H}$ , but we reject  $H_0$  and accept  $H_1$ .  $f$  cannot distinguish  $\mathcal{G}$  and  $\mathcal{H}$  means  
 710  $f(\mathcal{G}) = f(\mathcal{H}) = f(\mathcal{G}^\pi) \sim \mathcal{N}(\boldsymbol{\mu}_{\mathcal{G}}, \boldsymbol{\Sigma}_{\mathcal{G}})$ . Since  $\mathbf{d}_i$  in major procedure and  $\mathbf{d}_{i,j,k}$  in adaptive  
 711 confidence interval are derived from paired comparison by same function outputs, i.e., from  $f(\mathcal{G})$   
 712 and  $f(\mathcal{H})$ , and from  $f(\mathcal{G})$  and  $f(\mathcal{G}^\pi)$ , respectively.  $\mathbf{d}_i$  and  $\mathbf{d}_{i,j,k}$  should follow the same distribution,  
 713 leading that  $T_{\text{test}}^2$  and  $T_{i,j}^2$  are independently random variables following the same distribution. Thus  
 714  $P(T_{\text{test}}^2 > T_{i,j}^2) = \frac{1}{2}$ . Then we can calculate the probability of false positives as

$$P(\text{Rejecting } H_0) = P(T_{\text{test}}^2 > \text{Threshold} = \text{Max}_{i \in [2], j \in [p]} \{T_{i,j}^2\}) = \frac{1}{2^{2P}}. \quad (15)$$

715 Thus we proof theorem E.1. □

716 Regarding false negatives, we propose the following explanation. A small threshold can decrease  
 717 the false negative rate. Thus without compromising the rest of the theoretical analysis, we give the  
 718 minimum value of the threshold. Equation 13 introduces a minimum threshold restriction. We obtain  
 719 the threshold strictly based on it by taking the maximum value, which is the theoretical minimum  
 720 threshold that minimizes the false negative rate.

## 721 F Subgraph GNNs

722 In this section, we discuss settings for subgraph GNN models. The most important setting is the  
 723 subgraph radius. As discussed before, a larger radius can capture more structural information,  
 724 increasing the model’s expressiveness. However, it will include more invalid information, making  
 725 reaching the theoretical upper bound harder. Thus we need to find a balance between the two.

726 To achieve this, we first explore the maximum structural information that can be obtained under a  
 727 given radius. Following Papp and Wattenhofer [17], we implement  $N_k$  method, which embeds the  
 728 isomorphic type of  $k$ -hop subgraph when initializing. This method is only available in the theoretical  
 729 analysis as one can not solve the GI problem by manually giving graph isomorphic type. We mainly  
 730 use it as a general expressiveness upper bound of subgraph GNNs. The performance of  $N_k$  on BREC  
 731 is shown in Table 3. Actually,  $N_3$  already successfully distinguishes all graphs except for CFI graphs.  
 732  $k = 6$  is an important threshold as  $N_k$  outperforms 3-WL (expressiveness upper bound for most  
 733 subgraph GNNs [15, 16]) in all types of graphs. An interesting discovery is that increasing the radius  
 734 does not always lead to expressiveness increasing as expected. This is caused by the fact that we only

Table 4: The performance of 3-WL with different iteration times

| Iterations        | 1   | 2   | 3   | 4   | 5   |
|-------------------|-----|-----|-----|-----|-----|
| #Accurate on BREC | 193 | 209 | 217 | 264 | 270 |

Table 5: Substructure-based model performance on BREC

| Model      | Basic Graphs (60) |          | Regular Graphs (140) |          | Extension Graphs (100) |          | CFI Graphs (100) |          | Total (400) |          |
|------------|-------------------|----------|----------------------|----------|------------------------|----------|------------------|----------|-------------|----------|
|            | Number            | Accuracy | Number               | Accuracy | Number                 | Accuracy | Number           | Accuracy | Number      | Accuracy |
| $S_3$      | 52                | 86.7%    | 48                   | 34.3%    | 5                      | 5%       | 0                | 0%       | 105         | 26.2%    |
| $S_4$      | 60                | 100%     | 99                   | 70.7%    | 84                     | 84%      | 0                | 0%       | 243         | 60.8%    |
| GSN-v(k=3) | 52                | 86.7%    | 48                   | 34.3%    | 5                      | 5%       | 0                | 0%       | 105         | 26.2%    |
| GSN-v(k=4) | 60                | 100%     | 99                   | 70.7%    | 84                     | 84%      | 0                | 0%       | 243         | 60.8%    |
| GSN-e(k=3) | 59                | 98.3%    | 48                   | 34.3%    | 52                     | 52%      | 0                | 0%       | 159         | 39.8%    |
| GSN        | 60                | 100%     | 99                   | 70.7%    | 95                     | 95%      | 0                | 0%       | 254         | 63.5%    |

735 encode the exact  $k$ -hop subgraph instead of 1 to  $k$ -hop subgraphs. This phenomenon is similar to  
 736 subgraph GNNs, revealing the advantages of using distance encoding.

737 We then test the subgraph GNNs’ radii by increasing them until reaching the best performance, which  
 738 is expected to be a perfect balance. For some methods, radius= 6 is the best selection, which is  
 739 consistent with the theory. The exceptions are NGNN, NGNN+DE, KPGNN,  $I^2$ -GNN and SSWL\_P.  
 740 NGNN directly uses an inner GNN to calculate subgraph representation, whose expressiveness  
 741 is restricted by the inner GNN. As the subgraph radius increases, though the subgraph contains  
 742 information, the simple inner GNN can hardly give a correct representation. That’s why radius= 1 is  
 743 the best setting for NGNN. NGNN+DE and  $I^2$ -GNN add distance encodings, making the subgraph  
 744 with a large radius can always clearly extract a subgraph with a small radius. Therefore, a large  
 745 radius= 8 is available. KPGNN utilizes a similar setting by incorporating distance to subgraph  
 746 representation, and radius= 8 is also the best setting. KPGNN can also use graph diffusion to  
 747 replace the shortest path distance. Though graph diffusion outperforms some graphs, the shortest  
 748 path distance is generally a better solution. Previous findings reveal the advantages of using distance,  
 749 which we hope can be more widely used in further research. SSWL\_P achieves better expressiveness  
 750 with theoretical minimum components, making more information available.

## 751 G $k$ -WL Hierarchy GNNs

752 In this section, we discuss settings for  $k$ -WL hierarchy GNN models.  $k$ -WL algorithm requires a  
 753 converged tuple embedding distribution for GI. However,  $k$ -WL hierarchy GNNs do not have the  
 754 definition of converging. It will output the final embeddings after a specific number of layers, i.e.,  
 755 the iteration times of  $k$ -WL. Thus we need to give a suitable number of layers where the  $k$ -WL  
 756 converged after the number of iteration times. In theory, increasing the number of layers always leads  
 757 to a non-decreasing expressiveness, since the converged distribution will not change furthermore.  
 758 However, more layers may cause over-smoothing, leading to worse performance in practice.

759 To keep a balance, we utilize similar methods for subgraph GNNs. We first analyze the iteration  
 760 times of 3-WL, shown in Table 4. One can see 6 iteration times are enough for all types of graphs.  
 761 Then we increase the layers of  $k$ -WL GNNs until reaching the best performance. We finally set 5  
 762 layers for PPGN, 4 layers for KCSet-GNN and 6 layers for  $\delta$ -k-LGNN.

## 763 H Substructure-based GNNs

764 In this section, we discuss the performance of substructure-based GNN models. Specifically, we  
 765 focus on the GSN (Graph Substructure Network) model proposed by Bouritsas et al. [43], which  
 766 offers a straightforward neural network implementation, denoted as GSN-v, of the  $S_k$  substructure.  
 767 Additionally, we introduce GSN-e, a slightly stronger version of GSN-v that incorporates features on  
 768 edges instead of just nodes.

769 Experimental results presented in Table 5 demonstrate that GSN-v achieves a perfect match with the  
 770 performance of  $S_k$ . Furthermore, GSN-e outperforms GSN-v, indicating superior performance when  
 771 edge features are included.

Table 6: The performance of DropGNN with different sample numbers

| #Samples          | 100 | 200 | 400 | 800 | 1200 | 1600 |
|-------------------|-----|-----|-----|-----|------|------|
| #Accurate on BREC | 177 | 222 | 242 | 253 | 260  | OOM  |

Table 7: Model Hyperparameters

| Model              | Radius | Layers | Inner dim | Learning rate | Weight decay | Batch size | Epoch | Early stop threshold |
|--------------------|--------|--------|-----------|---------------|--------------|------------|-------|----------------------|
| NGNN               | 1      | 6      | 16        | $1e-4$        | $1e-5$       | 32         | 20    | 0.01                 |
| DE+NGNN            | 8      | 6      | 128       | $1e-4$        | $1e-5$       | 32         | 30    | 0.01                 |
| DS-GNN             | 6      | 10     | 32        | $1e-4$        | $1e-5$       | 32         | 30    | 0                    |
| DSS-GNN            | 6      | 9      | 32        | $1e-4$        | $1e-4$       | 32         | 20    | 0.01                 |
| SUN                | 6      | 9      | 32        | $1e-4$        | $1e-4$       | 32         | 20    | 0.01                 |
| SSWL_P             | 8      | 8      | 64        | $1e-5$        | $1e-5$       | 8          | 20    | 0.1                  |
| GNN-AK             | 6      | 4      | 32        | $1e-4$        | $1e-4$       | 32         | 10    | 0.1                  |
| KP-GNN             | 8      | 8      | 32        | $1e-4$        | $1e-4$       | 32         | 20    | 0.3                  |
| I <sup>2</sup> GNN | 8      | 5      | 32        | $1e-5$        | $1e-4$       | 16         | 20    | 0.2                  |
| PPGN               | /      | 5      | 32        | $1e-4$        | $1e-4$       | 32         | 20    | 0.2                  |
| $\delta$ -k-LGNN   | /      | 6      | 16        | $1e-4$        | $1e-4$       | 16         | 20    | 0.2                  |
| KC-SetGNN          | /      | 4      | 64        | $1e-4$        | $1e-4$       | 16         | 15    | 0.3                  |
| GSN                | /      | 4      | 64        | $1e-4$        | $1e-5$       | 16         | 20    | 0.1                  |
| DropGNN            | /      | 10     | 16        | $1e-3$        | $1e-5$       | 16         | 100   | 0                    |
| OSAN               | /      | 8      | 64        | $1e-3$        | $1e-5$       | 16         | 40    | 0                    |
| Graphormer         | /      | 12     | 80        | $2e-5$        | 0            | 16         | 100   | 0                    |

## 772 I Random GNNs

773 In this section, we delve into the settings for random GNNs. Random GNNs leverage samples from  
 774 graphs using specific strategies, and both the number of samples and the sampling strategies have an  
 775 impact on performance.

776 For DropGNN, the sampling strategy revolves around a relatively straightforward approach of deleting  
 777 nodes. As for the number of samples, it is recommended to set it to the average number of nodes  
 778 in the dataset. In our reported results, we set the number of samples to 100, which aligns with the  
 779 average number of nodes. The ablation study results on the number of samples can be found in  
 780 Table 6.

781 Another approach, OSAN, proposes a data-driven method that achieves similar performance with  
 782 fewer samples. This is achieved by training the model to select diverse samples. However, it requires  
 783 an additional training framework and may not necessarily lead to improved performance. In our case,  
 784 we select the edge-deleting strategy and set the number of samples to 20.

## 785 J Experiment Settings

786 All experiments were performed on a machine equipped with an Intel Core i9-10980XE CPU, an  
 787 NVIDIA RTX4090 graphics card, and 256GB of RAM.

788 **RPC settings.** For non-GNN methods, the output results are uniquely determined, and as such, this  
 789 part of the experiment does not require RPC. It is worth noting that most non-GNN baselines involve  
 790 running graph isomorphism testing software on subgraphs, and they mainly serve as theoretical  
 791 references in our evaluation.

792 Regarding GNNs, we employ RPC with  $q = 32$  and  $d = 16$  to evaluate their performance. Consider-  
 793 ing a confidence level of  $\alpha = 0.95$ , which is a typical setting in statistics, the threshold should be set  
 794 to  $\frac{(q-1)d}{(q-d)} F_{d,q-d}(\alpha) = 31F_{16,16}(0.95) = 72.34$ .

795 To ensure robustness, we repeat all evaluation methods ten times using different seeds selected  
 796 from the set  $\{100, 200, \dots, 1000\}$ . We consider the final results reliable only if the model passes  
 797 the Reliability check for all graphs with any seed, meaning that the quantification of the output  
 798 embedding distance between isomorphic pairs is always smaller than the threshold. The reported  
 799 results are selected as the best results rather than the average, as we aim to explore the upper bound  
 800 of expressiveness.

801 **Training settings.** We employ a Siamese network design and utilize the cosine similarity loss  
802 function. Another commonly used loss function is contrastive loss [34], which directly calculates the  
803 difference between two outputs. However, we opt for cosine similarity loss due to its advantage of  
804 measuring output difference under the same scale through normalization. This approach prevents  
805 model outputs from being excessively amplified, which could otherwise magnify minor precision  
806 errors and treat them as differentiated results of the model.

807 We use the Adam optimizer with a learning rate searched from  $\{1e-3, 1e-4, 1e-5\}$ , weight  
808 decay selected from  $\{1e-3, 1e-4, 1e-5\}$ , and batch size chosen from  $\{8, 16, 32\}$ . Graphormer,  
809 on the other hand, follows the original training settings on ZINC.

810 We incorporate an early stopping strategy, which halts training when the loss reaches a small value.  
811 While for random GNNs, we do not utilize early stopping. The maximum number of epochs is  
812 typically set to around 20 since the model can often distinguish a pair relatively quickly.

813 **Model hyperparameters.** The most crucial hyperparameters related to expressiveness, such as  
814 the subgraph radius for subgraph GNNs and the number of layers for  $k$ -WL hierarchy GNNs, are  
815 determined through theoretical analysis, as outlined in Appendix F and G. These hyperparameters  
816 have a direct impact on the expressiveness of the models.

817 Other hyperparameters also implicitly influence expressiveness. We generally adopt the same settings  
818 as previous expressiveness datasets, with two exceptions: inner embedding dimension and batch  
819 normalization.

820 The inner embedding dimension reflects the model’s capacity. For smaller and simpler expressiveness  
821 datasets used in the past, a small embedding dimension has been sufficient. However, the appropriate  
822 embedding dimension for BREC is unknown, so we generally conduct a search within the range of  
823 16, 32, 64, 128.

824 Additionally, we utilize batch normalization for all models, even though it may not have been used in  
825 all previous models. Batch normalization helps control the outputs within a suitable range, which can  
826 be beneficial for distinguishing graph pairs.

827 The detailed hyperparameter settings for each method are provided in Table 7.

## 828 K Graph Generation

829 In this section, we provide an overview of how the graphs in the BREC dataset were generated.

830 **Basic graphs.** This category consists of 60 pairs of graphs, each containing 10 nodes. To generate  
831 these graphs, the 1-WL algorithm was applied to all 11.7 million graphs with 10 nodes, resulting in a  
832 hash value for each graph. Among these graphs, 83,074 happened to have identical hash values as  
833 others. From this set, 60 pairs of graphs were randomly selected.

834 **Regular graphs.** This category includes 140 pairs of regular graphs. For the 50 simple regular  
835 graphs, the search was conducted for regular graphs with 6 to 10 nodes, and 50 pairs of regular  
836 graphs with the same parameters were randomly selected. For the 50 strongly regular graphs,  
837 the number of nodes ranged from 16 to 35. The graphs were obtained from sources such as  
838 <http://www.maths.gla.ac.uk/es/srgraphs.php> and <http://users.cecs.anu.edu.au/bdm/data/graphs.html>.  
839 For the 20 4-vertex condition graphs, a search was conducted on <http://math.ihringer.org/srgs.php>,  
840 and the simplest 20 pairs of 4-vertex condition graphs with the same parameters were selected. For  
841 the 20 distance regular graphs, a search was performed on <https://www.distanceregular.org/>, and the  
842 simplest 20 pairs of distance regular graphs with the same parameters were chosen.

843 **Extension graphs.** This category consists of 100 pairs of graphs based on comparing results between  
844 GNN extensions. The  $S_3$ ,  $S_4$ , and  $N_1$  algorithms were applied to all 1-WL-indistinguishable graphs  
845 with 10 nodes. This yielded 4,612  $S_3$ -indistinguishable graphs, 1,132  $N_1$ -indistinguishable graphs,  
846 and 136  $S_4$ -indistinguishable graphs. From these sets, 60 pairs of  $S_3$ -indistinguishable graphs, 20  
847 pairs of  $N_1$ -indistinguishable graphs, and 10 pairs of  $S_4$ -indistinguishable graphs were randomly  
848 selected. Care was taken to ensure that no graphs were repeated. Additionally, 10 pairs of graphs  
849 were added using a virtual node strategy, including 5 pairs obtained by adding a virtual node to a  
850 10-node regular graph and 5 pairs based on  $C_{2l}$  and  $C_{l,l}$  as described in Papp and Wattenhofer [17].

851 **CFI graphs.** This category consists of 100 pairs of graphs generated based on the CFI methods  
852 proposed by Cai et al. [28]. All CFI graphs with backbones ranging from 3 to 7-node graphs  
853 were generated. From this set, 60 pairs of 1-WL-indistinguishable graphs, 20 pairs of 3-WL-  
854 indistinguishable graphs, and 20 pairs of 4-WL-indistinguishable graphs were randomly selected.  
855 These different categories of graphs provide a diverse range of graph structures and properties for  
856 evaluating the expressiveness of GNN models.
